# Supplementary material
Source: PubMed Central journal article supplement (PMC3461117)
Supplement: NIHMS402795-supplement-2.pdf [file NIHMS402795-supplement-2.pdf]

CRP Binding Site      -35 Box      -10 Box

```

aggaattccc tgaatgtgac gcaaatcaact tcaaaagagtg agcaacagtc agtatcatca
tccttaaggg acttacactg cgtttagtga agtttctcac tcgttgtcag tcatagtagt

```

Stem-Loop Structure

```

tgtgagttaa accctcgccg cctgacgggtg agggttttct tttgggtatg tttatctgcg
acactcaatt tgggagcggc ggactgccac tcccaaaaga aaaccatac aaatagacgc

```

*rnk* Ribosome Binding Site      *rnk* Start

```

acactcgcag caccgacgac atggagtaaa atgtccaga ccaactatca tcattaacga
tgtgagcgtc gtggctgctg tacctcattt tacagggtct ggttgatagt agtaattgct

```

```

cctggatgcc gaacgcacg atattctgct ggagcaacc gcctatgctg gtttgccaat
ggacctacgg cttgcgtagc tataagacga cctcgttggg cggatacgcg caaacggtta

```

Amplification Junction → Truncated *citG*

```

cgccgacgcg ttaaacgcag agttggatcg cgccaaaatg ttattgcaa aagggggcat
cgggctgcgc aatttgcgtc tcaacctagc gcgggtttac aataacgtt ttccccgta

```

```

tcgaacccc gcgatctcg attatctccg gcagttcgac agggagtgta tcgaacgaaa
agcttggggg cggctagagc taatagaggc cgtaagctg tccctcacat agcttgcttt

```

```

tctcagtcca ggcggcagtg ctgacctact gatccttacc tggtttttag cacagattta
agagtcaggt ccgcccgtcac gactggatga ctaggaatgg accaaaaatc gtgtctaaat

```

*citT* Ribosome Binding Site      *citT* Start

```

attattttaag cacttgataa atttggaat attaatthtc ggagaaccgc atgtcttta
taataaatcc gtgaactatt taaaccttta taattaaaag cctcttgggc atacagaaat

```

Supplementary Figure 1 | Annotation of sequence adjacent to the *cit* amplification boundary found in *Cit*<sup>+</sup> genomes.

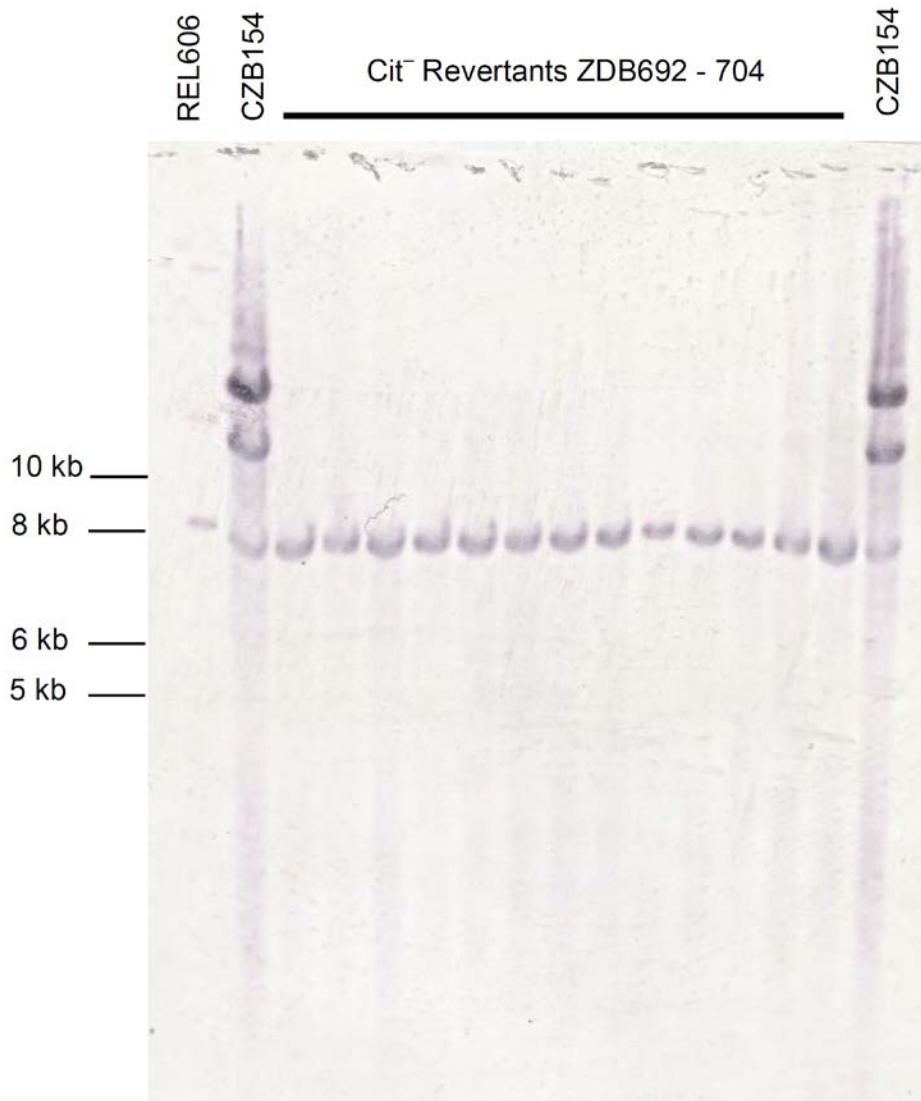

**Supplementary Figure 2 | Reversion to Cit<sup>-</sup> phenotype is associated with loss of *cit* amplification.**

The 33,000-generation Cit<sup>+</sup> clone, CZB154, has an increased *citT* band size relative to the ancestral strain, REL606, as a consequence of the *cit* amplification. By contrast, all 13 independent Cit<sup>-</sup> revertants of CZB154 have reduced *citT* band sizes, consistent with the loss of the *cit* amplification.

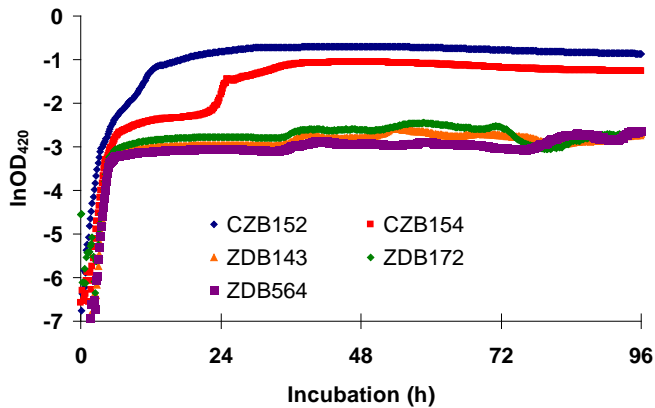

### Supplementary Figure 3 | Growth of early Cit<sup>+</sup> clones in DM25.

Early Cit<sup>+</sup> clones from population Ara-3 improved greatly in their capacity to grow on the citrate in DM25 over time. Cit<sup>+</sup> clones from generations 31,500 (ZDB564), 32,000 (ZDB172), and 32,500 (ZDB143) showed little growth on citrate even after 96 h, while two clones from generation 33,000 (CZB152 and CZB154) achieved substantial growth on citrate within 24 h. This improvement in citrate utilization allowed Cit<sup>+</sup> clones to rise from a minority of the population to numerical dominance.

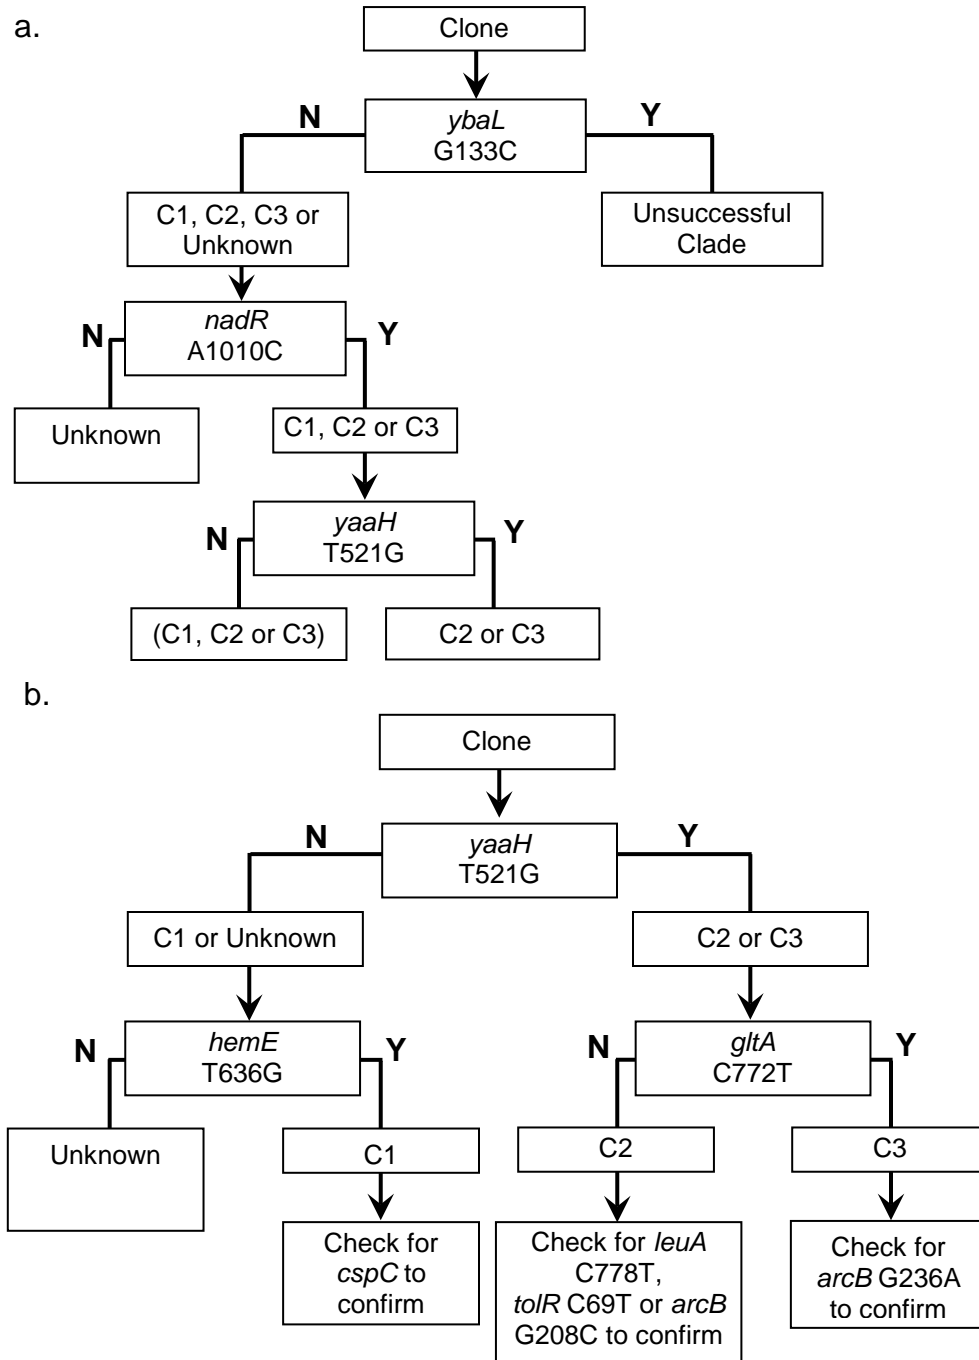

**Supplementary Figure 4 | Keys for placement of clones used in replay experiments.** The phylogenetic placement of each clone used in the replay experiments was determined by scoring the presence or absence of informative mutations according to the keys above. Clones sampled before generation 20,000 were placed using according to **a**, while those from generation 20,000 and later were placed using **b**. The lower resolution for earlier clones reflects the lesser divergence in earlier generations.

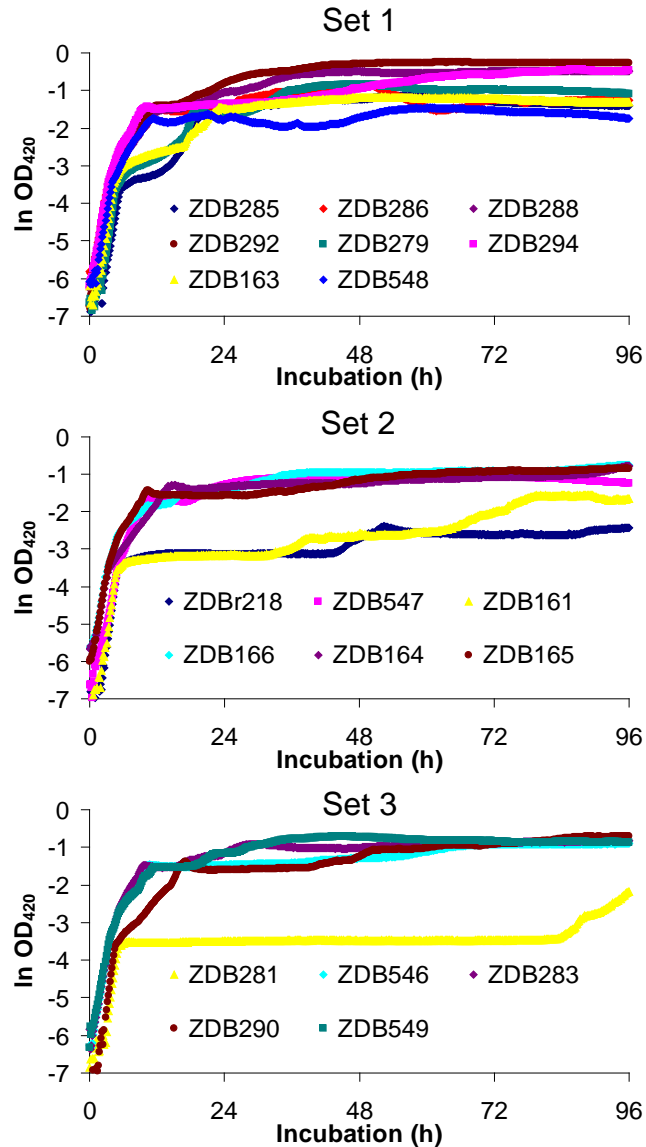

**Supplementary Figure 5 | Growth of  $Cit^+$  mutants derived in replay experiments.**

The 19 spontaneous  $Cit^+$  mutants isolated during the course of replay experiments vary in how quickly they transition from the glucose to the citrate and how well they grow on the citrate in DM25. Here mutants are grouped according to the mutations responsible for the  $Cit^+$  phenotype. The eight mutants in Set 1 have tandem *citT* duplications similar to that which evolved in the original population. The six mutants in Set 2 mutants have IS3 insertions in *citG*. The five mutants in Set 3 have a variety of mutations, as described in the main text and Supplementary Table 12.

| <b>Supplementary Table 1   Historical Ara-3 Clones Subjected to Whole Genome Sequencing</b> |               |                  |
|---------------------------------------------------------------------------------------------|---------------|------------------|
| <b>Generation</b>                                                                           | <b>Clones</b> | <b>Clade</b>     |
| 0                                                                                           | REL606        | N/A              |
| 2,000                                                                                       | REL1166A      | ?                |
| 5,000                                                                                       | ZDB409        | ?                |
| 10,000                                                                                      | ZDB429        | UC               |
| 15,000                                                                                      | ZDB446        | UC               |
| 20,000                                                                                      | ZDB458        | (C1,C2)          |
|                                                                                             | ZDB464*       | (C1,C2)          |
|                                                                                             | ZDB467        | (C1,C2)          |
| 25,000                                                                                      | ZDB477        | C1               |
|                                                                                             | ZDB483        | C3               |
| 30,000                                                                                      | ZDB16         | C1               |
|                                                                                             | ZDB357        | C2               |
| 31,500                                                                                      | ZDB199*       | C1               |
|                                                                                             | ZDB200        | C2               |
|                                                                                             | ZDB564        | Cit <sup>+</sup> |
| 32,000                                                                                      | ZDB30*        | C3               |
|                                                                                             | ZDB172        | Cit <sup>+</sup> |
| 32,500                                                                                      | ZDB158        | C2               |
|                                                                                             | ZDB143        | Cit <sup>+</sup> |
| 33,000                                                                                      | CZB199        | C1               |
|                                                                                             | CZB152        | Cit <sup>+</sup> |
|                                                                                             | CZB154        | Cit <sup>+</sup> |
| 34,000                                                                                      | ZDB83         | Cit <sup>+</sup> |
|                                                                                             | ZDB87         | C2               |
| 36,000                                                                                      | ZDB96         | Cit <sup>+</sup> |
|                                                                                             | ZDB99         | C1               |
| 38,000                                                                                      | ZDB107        | Cit <sup>+</sup> |
|                                                                                             | ZDB111        | C2               |
| 40,000                                                                                      | REL10979      | Cit <sup>+</sup> |
|                                                                                             | REL10988      | C2               |

\*Known potentiated clone

## **Supplementary Table 2 | Mutations in Population Ara-3 Clones Subjected to Whole Genome Sequencing**

This table shows all of the mutations found in the 29 genomes from population Ara-3 that were sequenced for this study. Owing to its large size, this table is provided in a separate zip file. When opened, this zip file generates a summary table showing all of the mutations in html format; separate tables that show the mutations for each individual genome in html format; and machine-readable data files for each individual genome.

**Supplementary Table 3 | Results of PCR screens on whole-population samples for *cit* amplification**

| <b>Generation</b> | <b>Replicate</b> | <b><i>cit</i> Amplification Detected?</b> |
|-------------------|------------------|-------------------------------------------|
| 25,000            | A                | –                                         |
|                   | B                | –                                         |
|                   | C                | –                                         |
| 30,000            | A                | –                                         |
|                   | B                | –                                         |
|                   | C                | –                                         |
| 31,500            | A                | –                                         |
|                   | B                | –                                         |
|                   | C                | –                                         |
| 32,000            | A                | –                                         |
|                   | B                | –                                         |
|                   | C                | +                                         |
| 32,500            | A                | –                                         |
|                   | B                | –                                         |
|                   | C                | –                                         |
| 33,000            | A                | +                                         |
|                   | B                | +                                         |
|                   | C                | +                                         |
| 33,500            | A                | +                                         |
|                   | B                | +                                         |
|                   | C                | +                                         |
| 34,000            | A                | +                                         |
|                   | B                | +                                         |
|                   | C                | +                                         |
| 36,000            | A                | +                                         |
|                   | B                | +                                         |
|                   | C                | +                                         |



**Supplementary Table 4 | PCR screens for *cit* amplification in Ara-3 clones**

| Generation | Clone  | Cit Phenotype | Amplification Detected? | Generation | Clone    | Cit Phenotype | Amplification Detected? |
|------------|--------|---------------|-------------------------|------------|----------|---------------|-------------------------|
| 31,500     | ZDB25  | -             | No                      | 35,000     | ZDB89    | +             | Yes                     |
|            | ZDB26  | -             | No                      |            | ZDB90    | +             | Yes                     |
|            | ZDB27  | -             | No                      |            | ZDB91    | +             | Yes                     |
|            | ZDB564 | +             | Yes                     |            | ZDB92    | -             | No                      |
|            | ZDB565 | +             | Yes                     |            | ZDB93    | +             | Yes                     |
|            | ZDB566 | +             | Yes                     |            | ZDB94    | +             | Yes                     |
| 32,000     | ZDB28  | -             | No                      | 36,000     | ZDB95    | +             | Yes                     |
|            | ZDB29  | -             | No                      |            | ZDB96    | +             | Yes                     |
|            | ZDB30  | -             | No                      |            | ZDB97    | +             | Yes                     |
|            | ZDB172 | +             | Yes                     |            | ZDB98    | +             | Yes                     |
|            | ZDB173 | +             | Yes                     |            | ZDB99    | -             | No                      |
|            | ZDB179 | +             | Yes                     |            | ZDB100   | -             | No                      |
| 32,500     | ZDB31  | -             | No                      | 37,000     | ZDB101   | +             | Yes                     |
|            | ZDB32  | -             | No                      |            | ZDB102   | +             | Yes                     |
|            | ZDB33  | -             | No                      |            | ZDB103   | -             | No                      |
|            | ZDB143 | +             | Yes                     |            | ZDB104   | -             | No                      |
|            | ZDB144 | +             | Yes                     |            | ZDB105   | -             | No                      |
|            | ZDB145 | +             | Yes                     |            | ZDB106   | -             | No                      |
| 33,000     | CZB199 | -             | No                      | 38,000     | ZDB107   | +             | Yes                     |
|            | CZB204 | -             | No                      |            | ZDB108   | +             | Yes                     |
|            | CZB205 | -             | No                      |            | ZDB109   | +             | Yes                     |
|            | CZB151 | +             | Yes                     |            | ZDB110   | -             | No                      |
|            | CZB152 | +             | Yes                     |            | ZDB111   | -             | No                      |
|            | CZB154 | +             | Yes                     |            | ZDB112   | +             | Yes                     |
| 34,000     | ZDB83  | -             | No                      | 40,000     | REL10979 | +             | Yes                     |
|            | ZDB84  | -             | No                      |            | REL10980 | +             | Yes                     |
|            | ZDB85  | -             | No                      |            | REL10981 | +             | Yes                     |
|            | ZDB86  | +             | Yes                     |            | REL10988 | -             | No                      |
|            | ZDB87  | +             | Yes                     |            | REL10989 | -             | No                      |
|            | ZDB88  | +             | Yes                     |            | REL10990 | -             | No                      |

| Supplementary Table 5   Point mutations in early Cit <sup>+</sup> genomes |                   |      |                   |                  |                                                                 |                    |                 |                 |                 |                 |                  |
|---------------------------------------------------------------------------|-------------------|------|-------------------|------------------|-----------------------------------------------------------------|--------------------|-----------------|-----------------|-----------------|-----------------|------------------|
| Genome Position                                                           | Nucleotide Change | Type | Amino-acid Change | Gene             | Product                                                         | Clone (generation) | ZDB564 (31,500) | ZDB172 (32,000) | ZDB143 (32,500) | CZB152 (33,000) | CZB154 (33,000)  |
| 447290                                                                    | T → C             | NC   | N/A               | <i>tesB/ybaY</i> | Acyl-CoA thioesterase II / predicted outer membrane lipoprotein |                    | Gray            | Gray            | Gray            | Gray            | Red/Crosshatched |
| 1399744                                                                   | T → C             | NS   | I228V             | <i>abgB</i>      | Predicted peptidase / aminobenoyl-glutamate utilization protein |                    | Gray            | Gray            | Red             | Gray            | Gray             |
| 2241625                                                                   | C → A             | NS   | A259S             | <i>ccmH</i>      | Heme lyase subunit                                              |                    | Gray            | Gray            | Red             | Gray            | Gray             |
| 2443160                                                                   | C → A             | S    | N/A               | <i>glk</i>       | Glucokinase                                                     |                    | Gray            | Gray            | Red             | Gray            | Gray             |
| 3612959                                                                   | C → T             | NC   | N/A               | <i>dctA/yhjK</i> | C4-dicarboxylate transporter / Predicted diguanylate cyclase    |                    | Gray            | Gray            | Gray            | Gray            | Red/Crosshatched |

Mutations shown are those that were not uniformly found in all five Cit<sup>+</sup> clones under study. Red fill indicates presence of mutation. Crosshatching further indicates mutation was also present in Cit<sup>+</sup> clones from generations 34,000, 36,000, and 38,000. Gray fill indicates absence of mutation.

| Supplementary Table 6   IS-element insertions in early Cit <sup>+</sup> genomes |         |                 |                                                                                 |                    |                 |                 |                 |                 |                 |
|---------------------------------------------------------------------------------|---------|-----------------|---------------------------------------------------------------------------------|--------------------|-----------------|-----------------|-----------------|-----------------|-----------------|
| Genome Position                                                                 | Element | Gene            | Product                                                                         | Clone (generation) | ZDB564 (31,500) | ZDB172 (32,000) | ZDB143 (32,500) | CZB152 (33,000) | CZB154 (33,000) |
| 595335                                                                          | IS 150  | <i>fepA/fes</i> | Outer membrane transporter/Ferric enterobactin esterase                         |                    | Gray            | Gray            | Gray            | Red             | Gray            |
| 620126                                                                          | IS 150  | <i>dsbG</i>     | Periplasmic disulfide isomerase/Thiol-disulphide oxidase                        |                    | Gray            | Gray            | Gray            | Red             | Gray            |
| 1028311                                                                         | IS 150  | <i>uup</i>      | Fused predicted transporter subunits of ABC superfamily: ATP-binding components |                    | Gray            | Red             | Gray            | Gray            | Gray            |
| 2322345                                                                         | IS 186  | <i>menC</i>     | O-succinylbenzoate                                                              |                    | Gray            | Gray            | Gray            | Gray            | Crosshatched    |
| 2877315                                                                         | IS 150  | <i>kduD</i>     | 2-deoxy-D-fluconate/3-dehydrogenase                                             |                    | Gray            | Gray            | Red             | Gray            | Gray            |
| 4252526                                                                         | IS 150  | <i>uvrA</i>     | Excinuclease ABC subunit A                                                      |                    | Gray            | Gray            | Red             | Gray            | Gray            |

Mutations shown are those that were not uniformly found in all five Cit<sup>+</sup> clones under study. Red fill indicates presence of mutation. Crosshatching further indicates mutation was also present in Cit<sup>+</sup> clones from generations 34,000, 36,000, and 38,000. Gray fill indicates absence of mutation.

| Supplementary Table 7   Deletions in early Cit <sup>+</sup> genomes |            |           |                                            |                    |                 |                 |                 |                 |                 |
|---------------------------------------------------------------------|------------|-----------|--------------------------------------------|--------------------|-----------------|-----------------|-----------------|-----------------|-----------------|
| Genome Start                                                        | Genome End | Size (bp) | Genes Deleted                              | Clone (generation) | ZDB564 (31,500) | ZDB172 (32,000) | ZDB143 (32,500) | CZB152 (33,000) | CZB154 (33,000) |
| 590472                                                              | 599560     | 9088      | <i>hokE, insL-3, entD, fepA, fes, ybdZ</i> |                    |                 |                 |                 |                 |                 |
| 590472                                                              | 595335     | 4863      | <i>hokE, insL-3, entD, fepA</i>            |                    |                 |                 |                 |                 |                 |
| 1345210                                                             | 1345211    | 1         | <i>yciR/mb</i>                             |                    |                 |                 |                 |                 |                 |
| 3786737                                                             | 3786738    | 1         | Noncoding                                  |                    |                 |                 |                 |                 |                 |

Mutations shown are those that were not uniformly found in all five Cit<sup>+</sup> clones under study. Red fill indicates presence of mutation. Crosshatching further indicates mutation was also present in Cit<sup>+</sup> clones from generations 34,000, 36,000, and 38,000. Gray fill indicates absence of mutation.

**Supplementary Table 8 | Amplifications in early Cit<sup>+</sup> genomes**

| Genome Start | Genome End | Size (bp)   | Genes Duplicated                                                                                                                                                                                                                                                                                                                                                                                                                                                                                                                                                                                                                                                                                                                                                                                                                                                                                                                                                                                                                                                                                                                         | Clone (Generation) | ZDB564 (31,500) | ZDB172 (32,000) | ZDB143 (32,500) | CZB152 (33,000) | CZB154 (33,000) |
|--------------|------------|-------------|------------------------------------------------------------------------------------------------------------------------------------------------------------------------------------------------------------------------------------------------------------------------------------------------------------------------------------------------------------------------------------------------------------------------------------------------------------------------------------------------------------------------------------------------------------------------------------------------------------------------------------------------------------------------------------------------------------------------------------------------------------------------------------------------------------------------------------------------------------------------------------------------------------------------------------------------------------------------------------------------------------------------------------------------------------------------------------------------------------------------------------------|--------------------|-----------------|-----------------|-----------------|-----------------|-----------------|
| 12452        | 12455      | 3 (x2)      | dnaK (internal fragment)                                                                                                                                                                                                                                                                                                                                                                                                                                                                                                                                                                                                                                                                                                                                                                                                                                                                                                                                                                                                                                                                                                                 |                    |                 |                 |                 |                 |                 |
| 599561       | 666130     | 66569 (x2)  | <i>[entF], fepE, fepC, fepG, fepD, ybdA, fepB, entC, entE, entB, entA, ybdB, cstA, cstA, ybdD, ybdH, ybdL, ybdM, ybdN, insB-8, insA-8, dsbG, ahpC, ahpF, ybdQ,ybdR, rnk, rna, citT, citG, citX, citF, citE,citD, citC, insB-9, insA-9, citA, citB, dcuC, crcA, cspE, ccrB, ybeM, tatE, lipA,ybeF, lipB, ybeD, dacA, rlpA, mrdB, mrdA, ybeA, ybeB, phpB, nadD, holA, rlpB, leuS, ybeL, ybeQ, ybeQ, ybeR, ybeV, hscC, rihA, gltL, insJ-2, insK-2, [gltL]</i>                                                                                                                                                                                                                                                                                                                                                                                                                                                                                                                                                                                                                                                                               |                    |                 |                 |                 |                 |                 |
| 619885       | 634746     | 14861 (x3)  | <i>[dsbG], ahpC, ahpF, ybdQ, ybdR, rnk, rna, citT, citG, citX, citF, citE, citD, citC, insB-9, insA-9</i>                                                                                                                                                                                                                                                                                                                                                                                                                                                                                                                                                                                                                                                                                                                                                                                                                                                                                                                                                                                                                                |                    |                 |                 |                 |                 |                 |
| 1729052      | 1995783    | 266731 (x3) | <i>[ydhV], ydhY, ydhZ, pykF, lpp, ynhG, sufE, sufS, sufD, sufC, sufB, sufA, ydiH, ydil, ydiJ, ydiK, ydiL, ydiM, ydiM, ydiN, ydiB, aroD, ydiF, ydiO, ydiP, ydiQ, ydiR, ydiS, ydiT, ydiD, ppsA, ydiA, aroH, ydiE, ydiU, ydiV, nlpC, btuD, btuE, btuC, himA, pheT, pheS, pheM, rplT, rpml, infC, thrS, arpB, arpB, ECB_01690, ydiY, pfkB, ydiZ ,yniA, yniB, yniC, ydjM, ydjN, ydjO, ceda, katE, ydjC, celF, celD, celC, celB, celA, osmE, nadE, ydjQ, ydjR, spy, astE, astB, astD, astA, astC, xthA, ydjX, ydjY, ydjY, ydjZ, ynjA, ynjB, ynjC, ynjD, ynjE, ynjF, nudG, ynjH, gdhA, ynjI, topB, selD, ydjA, sppA, ansA, pncA, ydjE, ydjF, ydjG, ydjH ,ydjI, ydjJ, ydjK, ydjL, yeaC, yeaA, gapA, yeaD, yeaE, mipA, yeaG, yeaH, yeaI, yeaJ, yeaK, ECB_01757, yeaL, yeaM, yeaN, yeaO, yoaF, yeaP, yeaQ, yoaG, yeaR, insL-4, yeaS, yeaT, yeaU, yeaV, yeaW, yeaX, md, fadD, yeaY, yeaZ, yoaA, yoaB, yoaC, yoaH, pabB, yeaB,sdaA, yoaD, yoaE, manX, manY, manZ,yobD, yebN, rrmA, cspC, yobF, yebO,yobG, ECB_01797, kdgR, yebQ, htpX,prc, proQ, yebR, yebS, yebT, yebU, yebV, yebW, pphA, yebY, yebZ, yobA, holE, yobB, exoX, ptrB, yebE, yebF,</i> |                    |                 |                 |                 |                 |                 |

**Supplementary Table 8 | Amplifications in early Cit<sup>+</sup> genomes**

| Genome Start | Genome End | Size (bp)    | Genes Duplicated                                                                                                                                                                                                                                                                                                                                                                                                                                                                                                                                                                                                                                                                                                                                                                                                                                                                                                                                                                                                                                                                                                                                                                                                                                                                                                                                                                                                                                                                                                                         | Clone (Generation) | ZDB564 (31,500) | ZDB172 (32,000) | ZDB143 (32,500) | CZB152 (33,000) | CZB154 (33,000) |
|--------------|------------|--------------|------------------------------------------------------------------------------------------------------------------------------------------------------------------------------------------------------------------------------------------------------------------------------------------------------------------------------------------------------------------------------------------------------------------------------------------------------------------------------------------------------------------------------------------------------------------------------------------------------------------------------------------------------------------------------------------------------------------------------------------------------------------------------------------------------------------------------------------------------------------------------------------------------------------------------------------------------------------------------------------------------------------------------------------------------------------------------------------------------------------------------------------------------------------------------------------------------------------------------------------------------------------------------------------------------------------------------------------------------------------------------------------------------------------------------------------------------------------------------------------------------------------------------------------|--------------------|-----------------|-----------------|-----------------|-----------------|-----------------|
|              |            |              | <i>yebG, purT, eda, edd, zwf, yebK, pykA, msbB, yebA, znuA, znuC, znuB, ruvB, ruvA, yebB, ruvC, yebC, ntpA, aspS, yecD, yecE, yecN, yecO, yecP, torZ, torY, cutC, yecM, argS, yecT, flhE, flhA, flhB, cheZ, cheY, cheB, cheR, tap, tar, cheW, cheA, motB, motA, flhC, flhD, yecG, otsA, otsB, araH, araG, araF, yecl, yecJ, yecR, ftn, yecH, tyrP, yecA, leuZ, cystT, glyW, pgsA, uvrC, yvrY, insA-13, insB-13, yedU, yedV, yedW, yedX, yedY, yedZ, yodA, yodB, serU, yeel, asnT, yeeJ, yeel, yeeL, shiA, amn, yeeN</i>                                                                                                                                                                                                                                                                                                                                                                                                                                                                                                                                                                                                                                                                                                                                                                                                                                                                                                                                                                                                                  |                    |                 |                 |                 |                 |                 |
| 3268052      | 2086894    | 1181158 (x2) | <i>rpmA, rplU, ispB, nlp, murA, yrbA, yrbB, yrbC, yrbD, yrbE, yrbF, yrbG, yrbH, yrbI, yrbK, yhbN, yhbG, rpoN, yhbH, ptsN, yhbJ, ptsO, yrbL, mtgA, yhbL, arcB, yhcC, gltB, gltD, yhcG, ECB_03080, yhcH, nanK, nanE, nanT, nanA, nanR, dcuD, sspB, sspA, rpsI, rplM, yhcM, yhcB, degQ, degS, mdh, argR, yhcN, yhcO, yhcP, yhcQ, yhcR, yhcS, tldD, yhdP, rng, maf, mreD, mreC, mreB, yhdA, yhdH, accB, accC, yhdT, panF, prmA, yhdG, fis, yhdJ, yhdU, envR, acrE, acrF, yhdV, yhdW, yhdX, yhdY, yhdZ, rrfF, thrV, rrfD, rrlD, alaU, ileU, rrsD, yrdA, yrdB, aroE, yrdC, yrdD, smg, smf, def, fmt, rrmB, trkA, mscL, yhdL, zntR, yhdN, rplQ, rpoA, rpsD, rpsK, rpsM, rpmJ, prlA, rplO, rpmD, rpsE, rplR, rplF, rpsH, rpsN, rplE, rplX, rplN, rpsQ, rpmC, rplP, rpsC, rplV, rpsS, rplB, rplW, rplD, rplC, rpsJ, pioO, gspA, gspC, gspD, gspE, gspF, gspG, gspH, gspI, gspJ, gspK, gspL, gspM, gspO, bfr, bfd, chiA, tuf, fusa, rpsG, rpsL, yheL, yheM, yheN, yheO, fkpA, slyX, slyD, kefB, yheR, yheS, yheT, yheU, prkB, yhfA, crp, yhfK, argD, pabA, fic, yhfG, ppiA, yhfC, nirB, nirD, nirC, cysG, yhfL, yhfM, yhfN, frlC, yhfQ, yhfR, yhfS, insB-23, insA-23, yhfS, yhfT, yhfU, yhfV, yhfW, yhfX, yhfY, yhfZ, trpS, gph, rpe, dam, damX, aroB, aroK, hofQ, yrfA, yrfB, yrfC, yrfD, mrcA, yrfE, yrfF, yrfG, hslR, hslO, yhgE, pckA, envZ, ompR, greB, yhgF, feoA, feoB, yhgG, yhgA, bioH, yhgH, yhgI, gntT, malQ, malP, malT, rtcA, rtcB, rtcR, glpR, glpG, glpE, glpD, yzgL, ECB_03279, yzgL, glgP, glgA, glgC, glgX, glgB, asd, yhgN,</i> |                    |                 |                 |                 |                 |                 |

**Supplementary Table 8 | Amplifications in early Cit<sup>+</sup> genomes**

| Genome Start | Genome End | Size (bp) | Genes Duplicated                                                                                                                                                                                                                                                                                                                                                                                                                                                                                                                                                                                                                                                                                                                                                               | Clone (Generation) | ZDB564 (31,500) | ZDB172 (32,000) | ZDB143 (32,500) | CZB152 (33,000) | CZB154 (33,000) |
|--------------|------------|-----------|--------------------------------------------------------------------------------------------------------------------------------------------------------------------------------------------------------------------------------------------------------------------------------------------------------------------------------------------------------------------------------------------------------------------------------------------------------------------------------------------------------------------------------------------------------------------------------------------------------------------------------------------------------------------------------------------------------------------------------------------------------------------------------|--------------------|-----------------|-----------------|-----------------|-----------------|-----------------|
|              |            |           | <i>gntU, gntK, gntR, yhhW, yhhX, yhhY, yhhZ, yrhA, yrhB, ggt, yhhA, ugpQ, ugpC, ugpE, ugpA, ugpB, livF, livG, livM, livH, livK, yhhK, livJ, rpoH, ftsX, ftsE, ftsY, yhhF, yhhL, yhhM, yhhN, zntA, sirA, yhhQ, dcrB, yhhS, yhhT, acpT, nikA, nikB, nikC, nikD, nike, nikR, rhsB, yhhH, yrhC, yhhI, yhhJ, yhiH, yhil, yhiJ, yhiKL, yhiM, yhiN, pitA, yhiO, uspA, yhiP, yhiQ, priC, yhiR, gor, arsR, arsB, arsC, yhiS, slp, yhiF, yhiD, hdeB, hdeA, hdeD, yhiE, yhiU, yhiV, yhiW, gadX, gadA, yhjA, treF, yhjB, yhjC, yhjD, yhjE, yhjG, yhjH, kdgK, yhjJ, dctA, yhjK, bcsC, bcsZ, yhjN, yhjO, yhjQ, yhjR, yhjS, yhjT, yhjU, ldrD, ldrD, ldrD, yhjV, dppF, dppD, dppC, dppB, dppA, proK, yhjW, yhjX, yhjY, tag, yiaC, bisC, yiaD, tkrA, yiaF, yiaG, cspA, hokA, insJ-4, insK-4</i> |                    |                 |                 |                 |                 |                 |

Mutations shown are those that were not uniformly found in all five Cit<sup>+</sup> clones under study. Red fill indicates presence of mutation. Crosshatching further indicates mutation was also present in Cit<sup>+</sup> clones from generations 34,000, 36,000, and 38,000. Gray fill indicates absence of mutation.

| Supplementary Table 9   Estimated <i>citT</i> copy number |          |                 |                 |                 |                          |             |                   |                      |                         |                                   |
|-----------------------------------------------------------|----------|-----------------|-----------------|-----------------|--------------------------|-------------|-------------------|----------------------|-------------------------|-----------------------------------|
| Gen (k)                                                   | Clone    | Junction Number |                 |                 |                          | Coverage    |                   |                      | Predicted Configuration | Predicted <i>rnk-citT</i> Modules |
|                                                           |          | Anc <i>rnk</i>  | Anc <i>citT</i> | <i>rnk-citT</i> | Relative <i>rnk-citT</i> | <i>citT</i> | Reference Regions | Relative <i>citT</i> |                         |                                   |
| 31.5                                                      | ZDB564   | 52              | 49              | 42              | 0.83                     | 120.8       | 64.9              | 1.86                 | 2×                      | 1                                 |
| 32                                                        | ZDB172   | 45              | 39              | 82              | 1.95                     | 139.3       | 23.8              | 5.86                 | 2× (3×)                 | 4                                 |
| 32.5                                                      | ZDB143   | 116             | 76              | 301             | 3.14                     | 457.2       | 112.8             | 4.05                 | 4×                      | 3                                 |
| 33                                                        | CZB152   | 22              | 23              | 192             | 8.53                     | 267.4       | 32.7              | 8.18                 | 9×                      | 8                                 |
|                                                           | CZB154   | 398             | 252             | 345             | 1.06                     | 797.6       | 130.0             | 6.14                 | 3× (2×)                 | 3                                 |
| 34                                                        | ZDB83    | 57              | 43              | 125             | 2.50                     | 214.7       | 62.9              | 3.42                 | 4×                      | 3                                 |
| 36                                                        | ZDB96    | 26              | 22              | 87              | 3.63                     | 97.4        | 28.8              | 3.39                 | 4×                      | 3                                 |
| 38                                                        | ZDB107   | 51              | 32              | 133             | 3.20                     | 204.7       | 60.0              | 3.41                 | 4×                      | 3                                 |
| 40                                                        | REL10979 | 36              | 32              | 73              | 2.15                     | 115.6       | 32.5              | 3.56                 | 4×                      | 3                                 |

For each *Cit*<sup>+</sup> genome, the number of new junctions per genome was estimated from the relative number of reads supporting the new *rnk-citT* junction produced by the amplification versus the number of reads supporting the ancestral *rnk* and *citT* junctions. The total number of *citT* copies per genome was estimated by comparing read-depth coverage of the amplified *citT* region to coverage of regions that appear to be single copy in all genomes (comprising ~20 kb total including the *ara* operon and *tufB* gene). Together these data can be used to predict the likely configuration of *citT* amplification copies in each genome. Examination of read-depth coverage over a larger area supports the observation that there are nested amplifications in CZB154 and ZDB172. For example, the CZB154 genome contains three copies of a larger region, and each copy of that region contains two tandem copies with the usual *rnk-citT* junction.



**Supplementary Table 10 | Phylogenetically informative mutations**

| <b>Gene</b> | <b>Gene Product</b>                                                                                              | <b>Genome Position</b> | <b>Gene Position</b> | <b>Ancestral Nucleotide</b> | <b>Evolved Nucleotide</b> | <b>Associated Clades</b> |
|-------------|------------------------------------------------------------------------------------------------------------------|------------------------|----------------------|-----------------------------|---------------------------|--------------------------|
| <i>ybaL</i> | Predicted transporter with NAD(P)-binding Rossmann-fold domain                                                   | 475173                 | 133                  | G                           | C                         | UC                       |
| <i>nadR</i> | Nicotinamide-nucleotide adenyltransferase                                                                        | 4616538                | 1010                 | A                           | C                         | C1,C2,C3                 |
| <i>hemE</i> | Uroporphyrinogen decarboxylase                                                                                   | 4177963                | 636                  | T                           | G                         | C1                       |
| <i>cspC</i> | Stress protein, member of the CspA-family                                                                        | 1886011                | 4                    | C                           | A                         | C1                       |
| <i>yaaH</i> | Conserved inner membrane protein associated with acetate transport                                               | 9972                   | 521                  | T                           | G                         | C2,C3                    |
| <i>leuA</i> | 2-isopropylmalate synthase                                                                                       | 85556                  | 778                  | C                           | T                         | C2                       |
| <i>tolR</i> | Membrane spanning protein in TolA-TolQ-TolR complex                                                              | 756799                 | 69                   | C                           | T                         | C2                       |
| <i>arcB</i> | Hybrid sensory histidine kinase in two-component regulatory system with ArcA. Aerobic respiration control sensor | 3288053                | 208                  | G                           | C                         | C2                       |
|             |                                                                                                                  | 3288026                | 236                  | T                           | A                         | C3                       |
| <i>gltA</i> | Citrate synthase                                                                                                 | 734488                 | 772                  | G                           | A                         | C3                       |



















**Supplementary Table 11 | Phylogenetic placement of Cit<sup>-</sup> replay clones**

| Generation | Clone   | Phylogenetically Informative Mutations |             |             |             |             |             |             |             |             |             |             | Clade |
|------------|---------|----------------------------------------|-------------|-------------|-------------|-------------|-------------|-------------|-------------|-------------|-------------|-------------|-------|
|            |         | Gene                                   | <i>ybaL</i> | <i>nadR</i> | <i>hemE</i> | <i>cspC</i> | <i>yaaH</i> | <i>leuA</i> | <i>tolR</i> | <i>arcB</i> | <i>arcB</i> | <i>gltA</i> |       |
|            |         | Gene Position                          | 133         | 1010        | 636         | 4           | 521         | 778         | 69          | 208         | 236         | 772         |       |
|            |         | Ancestral Nucleotide                   | G           | A           | T           | C           | T           | C           | C           | G           | T           | G           |       |
|            |         | Evolved Nucleotide                     | C           | C           | G           | A           | G           | T           | T           | C           | A           | A           |       |
| 32,500     | ZDB155  |                                        |             |             |             |             |             |             |             |             |             |             | C1    |
| 32,500     | ZDB156  |                                        |             |             |             |             |             |             |             |             |             |             | C1    |
| 32,500     | ZDB157  |                                        |             |             |             |             |             |             |             |             |             |             | C3    |
| 32,500     | ZDB158* |                                        |             |             |             |             |             |             |             |             |             |             | C2    |
| 32,500     | ZDB159  |                                        |             |             |             |             |             |             |             |             |             |             | C2    |
| 32,500     | ZDB160  |                                        |             |             |             |             |             |             |             |             |             |             | C1    |
| 32,500     | ZDB398  |                                        |             |             |             |             |             |             |             |             |             |             | C1    |
| 32,500     | ZDB399  |                                        |             |             |             |             |             |             |             |             |             |             | C2    |

\*Genome has been sequenced.

Red fill indicates presence of mutation has been established by sequencing. Gray fill indicates absence of mutation has been established by sequencing. No fill indicates that the presence or absence of mutation was not examined.

Clade refers to UC, C1, C2, or C3 as shown in Fig. 1 of the main text. When two or more clades are grouped by parentheses, either the clone belongs to the basal group or the clone's placement could not be resolved further based on the available data. n.d. indicates that the clone belongs to some other early clade or its placement could not be resolved based on the available data.

**Supplementary Table 12 | Mutations affecting *cit* region in Cit<sup>+</sup> replay mutants**

| Generation | Cit <sup>-</sup> Parent | Clade   | Cit <sup>+</sup> Mutant                                                               | Mutation affecting <i>cit</i> Region                                                                    |
|------------|-------------------------|---------|---------------------------------------------------------------------------------------|---------------------------------------------------------------------------------------------------------|
| 20,000     | ZDB464*                 | C3      | ZDB285*                                                                               | 2978-bp tandem <i>cit</i> duplication that creates <i>rnk-citT</i> regulatory module.                   |
|            |                         |         | ZDB286                                                                                | 2656-bp tandem <i>cit</i> duplication that creates <i>rnk-citT</i> regulatory module.                   |
| 27,000     | ZDB309                  | C3      | ZDB288                                                                                | 2070-bp tandem <i>cit</i> duplication that creates <i>rna-citT</i> regulatory module.                   |
|            | ZDB310                  | C3      | ZDB290*                                                                               | ~5,000-bp tandem duplication. Basis of <i>citT</i> activation unknown.                                  |
| 30,500     | ZDB20                   | C3      | ZDB547                                                                                | IS3 insertion in <i>citG</i> .                                                                          |
| 31,000     | ZDB390                  | C1      | ZDB292                                                                                | 2706-bp tandem <i>cit</i> duplication that creates <i>rnk-citT</i> regulatory module.                   |
| 31,500     | ZDB25                   | C3      | ZDBr218                                                                               | IS3 insertion in <i>citG</i>                                                                            |
|            | ZDB199                  | C1      | ZDB279                                                                                | 2745-bp tandem <i>cit</i> duplication that creates <i>rnk-citT</i> regulatory module.                   |
| 32,000     | ZDB28                   | C3      | ZDB161                                                                                | IS3 insertion in <i>citG</i> .                                                                          |
|            | ZDB29                   | C2      | ZDB166                                                                                | IS3 insertion in <i>citG</i> .                                                                          |
|            | ZDB30*                  | C3      | ZDB164                                                                                | IS3 insertion in <i>citG</i> .                                                                          |
|            |                         |         | ZDB165*                                                                               | IS3 insertion in <i>citG</i> .                                                                          |
|            |                         |         | ZDB283*                                                                               | ~568-kbp inversion that places much of the <i>cit</i> operon under control of the <i>fimB</i> promoter. |
|            | ZDB294*                 |         | 2663-bp tandem <i>cit</i> duplication that creates <i>rnk-citT</i> regulatory module. |                                                                                                         |
| ZDB183     | C3                      | ZDB281* | ~14.3-kbp duplication. Basis of <i>citT</i> activation unresolved.                    |                                                                                                         |
| 32,500     | ZDB31                   | C3      | ZDB163                                                                                | 2990-bp tandem <i>cit</i> duplication that creates <i>rnk-citT</i> regulatory module.                   |
|            |                         |         | ZDB546                                                                                | Unknown rearrangement or duplication affecting <i>citT</i> .                                            |
|            |                         |         | ZDB549                                                                                | 422-bp deletion in <i>citG</i> . Basis of <i>citT</i> activation unresolved.                            |
|            | ZDB32                   | C2      | ZDB548                                                                                | 3144-bp tandem <i>cit</i> duplication that creates <i>rnk-citT</i> regulatory module.                   |

\*Genome has been sequenced.

**Supplementary Table 13 | Annotated differences between genomes of four Cit<sup>+</sup> mutants and their Cit<sup>-</sup> parent clones**

| Supplementary Table 13a   Pair 1: ZDB464 (Generation 20,000) and Cit <sup>+</sup> Mutant ZDB285 |                     |                                                                                                                                                      |                              |                                                                                                               | Cit <sup>-</sup> Parent | Cit <sup>+</sup> Mutant |
|-------------------------------------------------------------------------------------------------|---------------------|------------------------------------------------------------------------------------------------------------------------------------------------------|------------------------------|---------------------------------------------------------------------------------------------------------------|-------------------------|-------------------------|
| Position                                                                                        | Mutation            | Description                                                                                                                                          | Gene or Genes Involved       | Product(s)                                                                                                    | ZDB464                  | ZDB285                  |
| 626102                                                                                          | 2794 bp duplication | Tandem duplication with one junction in <i>citG</i> and the other between <i>rna</i> and <i>rnk</i> ; presumed Cit <sup>+</sup> actualizing mutation | <i>citG</i>                  | Triphosphoribosul-dephospho-CoA transferase                                                                   |                         |                         |
|                                                                                                 |                     |                                                                                                                                                      | <i>citT</i>                  | Citrate transporter                                                                                           |                         |                         |
|                                                                                                 |                     |                                                                                                                                                      | <i>rna</i>                   | Ribonuclease I                                                                                                |                         |                         |
| 848202                                                                                          | IS150 Insertion     | Insertion in a coding region                                                                                                                         | <i>ybiS</i>                  | Hypothetical protein                                                                                          |                         |                         |
| 1360374                                                                                         | IS150 Insertion     | Insertion in a coding region                                                                                                                         | <i>ycjC</i>                  | DNA-binding transcriptional repressor                                                                         |                         |                         |
| 3270443                                                                                         | IS150 Insertion     | Insertion in a non-coding, intergenic region; promoters not disrupted                                                                                | Site between <i>nlp/murA</i> | DNA-binding transcriptional activator of maltose metabolism/UDP-N-acetylglucosamine 1-carboxyvinyltransferase |                         |                         |

| Supplementary Table 13b   Pair 2: ZDB30 (Generation 32,000) and Cit <sup>+</sup> Mutant ZDB165 |               |                                                                              |                        |                                                 | Cit <sup>-</sup> Parent | Cit <sup>+</sup> Mutant |
|------------------------------------------------------------------------------------------------|---------------|------------------------------------------------------------------------------|------------------------|-------------------------------------------------|-------------------------|-------------------------|
| Position                                                                                       | Mutation      | Description                                                                  | Gene or Genes Involved | Product(s)                                      | ZDB30                   | ZDB165                  |
| 628716                                                                                         | IS3 Insertion | Insertion in a coding region; presumed Cit <sup>+</sup> actualizing mutation | <i>citG</i>            | Triphosphoribosul-dephospho-CoA transferase     |                         |                         |
| 1651966                                                                                        | Δ795 bp       | Deletion of multiple coding regions                                          | <i>ydgG</i>            | Transporter of quorum signal AI-2               |                         |                         |
|                                                                                                |               |                                                                              | <i>pntB</i>            | Pyridine nucleotide transhydrogenase, β subunit |                         |                         |

| Supplementary Table 13c   Pair 3: ZDB30 (Generation 32,000) and Cit <sup>+</sup> ZDB293 |                     |                                                                                                                                                                                                             |                        |                                                                              | Cit <sup>-</sup> Parent | Cit <sup>+</sup> Mutant |
|-----------------------------------------------------------------------------------------|---------------------|-------------------------------------------------------------------------------------------------------------------------------------------------------------------------------------------------------------|------------------------|------------------------------------------------------------------------------|-------------------------|-------------------------|
| Position                                                                                | Mutation            | Description                                                                                                                                                                                                 | Gene or Genes Involved | Gene Product(s)                                                              | ZDB30                   | ZDB293                  |
| 632864                                                                                  | 568476 bp inversion | Most of <i>cit</i> operon structural genes placed downstream of <i>fimB</i> promoter; new junctions in <i>citC</i> and between <i>yjhA</i> and <i>fimB</i> ; presumed Cit <sup>+</sup> actualizing mutation | <i>citC</i>            | Citrate lyase synthetase                                                     |                         |                         |
|                                                                                         |                     |                                                                                                                                                                                                             | <i>fimB</i>            | Regulator of <i>fimA</i> pili subunit                                        |                         |                         |
| 687047                                                                                  | IS150 Insertion     | Insertion in a coding region                                                                                                                                                                                | <i>nagE</i>            | Fused N-acetyl glucosamine specific PTS enzyme: IIC, IIB, and IIA components |                         |                         |

| Supplementary Table 13d   Pair 4: ZDB30 (Generation 32,000) and Cit <sup>+</sup> Mutant ZDB294 |                                                                        |                                                                                                                                         |                        |                                                                     | Cit <sup>-</sup> Parent | Cit <sup>+</sup> Mutant |
|------------------------------------------------------------------------------------------------|------------------------------------------------------------------------|-----------------------------------------------------------------------------------------------------------------------------------------|------------------------|---------------------------------------------------------------------|-------------------------|-------------------------|
| Position                                                                                       | Mutation                                                               | Description                                                                                                                             | Gene or Genes Involved | Gene Product(s)                                                     | ZDB30                   | ZDB294                  |
| 626107                                                                                         | 2661 bp duplication                                                    | Tandem duplication with junctions in <i>citG</i> and between <i>rna</i> and <i>rnk</i> ; presumed Cit <sup>+</sup> actualizing mutation | <i>citG</i>            | Triphosphoribosul–dephospho–CoA transferase                         | Gray                    | Red                     |
|                                                                                                |                                                                        |                                                                                                                                         | <i>citT</i>            | Citrate transporter                                                 |                         |                         |
|                                                                                                |                                                                        |                                                                                                                                         | <i>rna</i>             | Ribonuclease I                                                      |                         |                         |
| 1607917                                                                                        | Δ1 bp                                                                  | Single nucleotide deletion in a coding region                                                                                           | <i>ECB_1510</i>        | Putative tail component of prophage                                 | Gray                    | Red                     |
| 1729055                                                                                        | Δ2462 bp                                                               | IS150–mediated deletion of multiple coding regions                                                                                      | <i>ydhV</i>            | Predicted oxidoreductase                                            | Gray                    | Red                     |
|                                                                                                |                                                                        |                                                                                                                                         | <i>ydhY</i>            | Predicted 4Fe–4S ferredoxin–type protein                            |                         |                         |
| 2157881                                                                                        | Δ12781 bp                                                              | IS150–mediated deletion of multiple coding regions.                                                                                     | <i>yehM</i>            | Conserved protein                                                   | Gray                    | Red                     |
|                                                                                                |                                                                        |                                                                                                                                         | <i>yehP</i>            | Conserved protein                                                   |                         |                         |
|                                                                                                |                                                                        |                                                                                                                                         | <i>yehQ</i>            | Possible pseudogene                                                 |                         |                         |
|                                                                                                |                                                                        |                                                                                                                                         | <i>yehR</i>            | Conserved protein                                                   |                         |                         |
|                                                                                                |                                                                        |                                                                                                                                         | <i>yehS</i>            | Conserved protein                                                   |                         |                         |
|                                                                                                |                                                                        |                                                                                                                                         | <i>yehT</i>            | Predicted sensory kinase in two–component system with YehU          |                         |                         |
|                                                                                                |                                                                        |                                                                                                                                         | <i>yehU</i>            | Predicted sensory kinase in two–component system with YehT          |                         |                         |
|                                                                                                |                                                                        |                                                                                                                                         | <i>yehV</i>            | MerR–like regulator                                                 |                         |                         |
|                                                                                                |                                                                        |                                                                                                                                         | <i>ECB_02057</i>       | Unknown function                                                    |                         |                         |
|                                                                                                |                                                                        |                                                                                                                                         | <i>yehW</i>            | Membrane component of an ABC transporter involved in osmoprotection |                         |                         |
|                                                                                                |                                                                        |                                                                                                                                         | <i>yehX</i>            | Membrane component of an ABC transporter involved in osmoprotection |                         |                         |
|                                                                                                |                                                                        |                                                                                                                                         | <i>yehY</i>            | Membrane component of an ABC transporter involved in osmoprotection |                         |                         |
| <i>yehZ</i>                                                                                    | Periplasmic component of an ABC transporter involved in osmoprotection |                                                                                                                                         |                        |                                                                     |                         |                         |

Red fill indicates presence of mutation. Gray fill indicates absence of corresponding mutation.

**Supplementary Table 14 | Primer pairs used in this study**

| <b>Gene or Region Amplified</b>                                                      | <b>Primer Name</b>       | <b>Primer Sequence</b>                          | <b>PCR Product Size</b> |
|--------------------------------------------------------------------------------------|--------------------------|-------------------------------------------------|-------------------------|
| <i>ybaL</i> mutation                                                                 | <i>ybaL</i> mut F        | 5' CATCGCCCTGTTCCATCATTCT 3'                    | 503 bp                  |
|                                                                                      | <i>ybaL</i> mut R        | 5' ACCCCGCTTATCACCACCATTGTT 3'                  |                         |
| <i>nadR</i> mutation                                                                 | <i>nadR</i> mut F        | 5' ATGGTCGCGATTATGTCTTTTCAC 3'                  | 459 bp                  |
|                                                                                      | <i>nadR</i> mut R        | 5' CGTTTCATCGCGGTTATCTCTG 3'                    |                         |
| <i>hemE</i> mutation                                                                 | <i>hemE</i> mut F        | 5' GTGCCGACGCGATGGGGTTAG 3'                     | 524 bp                  |
|                                                                                      | <i>hemE</i> mut R        | 5' CACTGTCCGCCGCTTTGGTA 3'                      |                         |
| <i>cspC</i> mutation                                                                 | <i>cspC</i> mut F        | 5' GGGCAAATATCCGAACG 3'                         | 412 bp                  |
|                                                                                      | <i>cspC</i> mut R        | 5' AGCCTTATATTGGTGCCTCAT 3'                     |                         |
| <i>yaaH</i> mutation                                                                 | <i>yaaH</i> mut F        | 5' CTTTCGCGTCAGGTTGGTGTG 3'                     | 1030 bp                 |
|                                                                                      | <i>yaaH</i> mut R        | 5' CCTGCCTGCGCCGGATGGTTAG 3'                    |                         |
| <i>leuA</i> mutation                                                                 | <i>leuA</i> mut F        | 5' GAATGCGCCGCTGCCAACA 3'                       | 497 bp                  |
|                                                                                      | <i>leuA</i> mut R        | 5' GCCTCAACCAGCGCGTAAACAAA 3'                   |                         |
| <i>tolR</i> mutation                                                                 | <i>tolR</i> mut F        | 5' GCCTCAACCAGCGCGTAAACAAA 3'                   | 400 bp                  |
|                                                                                      | <i>tolR</i> mut R        | 5' ACTTCCGCCACCACCTGCTCTG 3'                    |                         |
| <i>arcB</i> mutation                                                                 | <i>arcB</i> mut F        | 5' TGTGCGGACCAAAGCCCATCA 3'                     | 709 bp                  |
|                                                                                      | <i>arcB</i> mut R        | 5' GCCCTCGTCGTTCTTGCCATTGT 3'                   |                         |
| <i>gltA</i> mutation                                                                 | <i>gltA</i> mut F        | 5' TGTGTTTAACGGAGCTGATTTCTT 3'                  | 626 bp                  |
|                                                                                      | <i>gltA</i> mut R        | 5' GCTGGCGACCGATTCTAACTACCT 3'                  |                         |
| <i>cit</i> amplification                                                             | <i>cit</i> Tout F        | 5' GTCCTGGGTGATTATTTACGGCT 3'                   | 1807 bp                 |
|                                                                                      | <i>cit</i> Tout R        | 5' CAATAACGCAAATAGTAACCGCAA 3'                  |                         |
| <i>citAmpJ</i> fragment                                                              | <i>citAmpJ</i> F         | 5' TTTTTTGGATCCGGTTTCAATGCCCCCTTTTT 3'          | 529 bp                  |
|                                                                                      | <i>citAmpJ</i> R         | 5' TTTTTTGTGCGACGGTAACCCTGCGTATTTGACTGAA 3'     |                         |
| <i>rnk</i> promoter region of <i>rnk-citT</i> module for expression studies          | nctForward               | 5' AAAAAAGGATCCGACACCCATCACCACAGT 3'            | 707 bp                  |
|                                                                                      | nctReverse               | 5' AAAAACTCGAGACGCCATCAACGCTCCGCTTTCT 3'        |                         |
| <i>citT-citG</i> fragment for gene-gorging                                           | <i>citT-citG</i> F       | 5' AACCAGCCAGGCCCATTTTCAGC 3'                   | 648 bp                  |
|                                                                                      | <i>citT-citG</i> R       | 5' AAAAAAGGATCCCACGCCTTGCCGCATTACCTCACT 3'      |                         |
| <i>citG</i> frag fragment for gene-gorging                                           | <i>citG</i> frag F       | 5' TTTTTTGGATCCGGGGTTCGAATGCCCCCTTTTT 3'        | 694 bp                  |
|                                                                                      | <i>citG</i> frag R       | 5' GCACAAAGATATGGCGCTGGAAGA 3'                  |                         |
| <i>rnk</i> promoter and <i>cit</i> amplification junction construct for gene-gorging | <i>citT-citG</i> Gorge F | 5' TAGGGATAACAGGGTAATAACCAGCCAGGCCCATTTTCAGC 3' | 1889 bp*                |
|                                                                                      | <i>citG</i> frag R       | 5' GCACAAAGATATGGCGCTGGAAGA 3'                  |                         |
| <i>rnk-citT</i> module for cloning into pUC19                                        | <i>citTAmpX</i> F        | 5' AAAAAAGGATCCGGGCAGCAACCGATTTAGG 3'           | 2490 bp                 |
|                                                                                      | <i>citTAmpX</i> R        | 5' AAAAAAGTGCACAACGCTCCGCTTTCTGC 3'             |                         |
| <i>citT</i> internal fragment for Southern hybridizations                            | <i>citT</i> probe F      | 5' AGCCGTAATAATCACCCAGGAC 3'                    | 1173 bp                 |
|                                                                                      | <i>citT</i> probe R      | 5' TTGCGGTTACTATTTGCGTTATTG 3'                  |                         |
| Amplification of genomic region immediately upstream of <i>citT</i>                  | <i>citT</i> upstrm R     | 5' CTCTCCCGCCGCGACTATTCA 3'                     | 1264 bp <sup>†</sup>    |
|                                                                                      | <i>citT</i> upstrm F     | 5' CAATAACGCAAATAGTAACCGCAA 3'                  |                         |

\*Length for fully assembled construct.

<sup>†</sup>Length without deletions or insertions.

| <b>Supplementary Table 15   Clones used in growth-trajectory experiments</b> |                   |                                                                                                                        |                                 |
|------------------------------------------------------------------------------|-------------------|------------------------------------------------------------------------------------------------------------------------|---------------------------------|
| <b>Clone</b>                                                                 | <b>Generation</b> | <b>Description</b>                                                                                                     | <b>Growth Curve Locations</b>   |
| REL606                                                                       | 0                 | Ancestor                                                                                                               | Fig. 6                          |
| CZB152                                                                       | 33,000            | Cit <sup>+</sup> clone from main population                                                                            | Fig. 5, Supplementary Fig. 3    |
| CZB154                                                                       | 33,000            | Cit <sup>+</sup> clone from main population                                                                            | Supplementary Fig. 3            |
| ZDB30                                                                        | 32,000            | Potentiated Cit <sup>-</sup> clone from Clade 3                                                                        | Fig. 4, 5, 6                    |
| ZDB143                                                                       | 32,500            | Cit <sup>+</sup> clone from main population                                                                            | Supplementary Fig. 3            |
| ZDB161                                                                       | 32,000            | Cit <sup>+</sup> mutant of ZDB28                                                                                       | Supplementary Fig. 5            |
| ZDB163                                                                       | 32,500            | Cit <sup>+</sup> mutant of ZDB31                                                                                       | Supplementary Fig. 5            |
| ZDB164                                                                       | 32,000            | Cit <sup>+</sup> mutant of ZDB30                                                                                       | Supplementary Fig. 5            |
| ZDB165                                                                       | 32,000            | Cit <sup>+</sup> mutant of ZDB30                                                                                       | Supplementary Fig. 5            |
| ZDB166                                                                       | 32,000            | Cit <sup>+</sup> mutant of ZDB29                                                                                       | Supplementary Fig. 5            |
| ZDB172                                                                       | 32,000            | Cit <sup>+</sup> clone from main population                                                                            | Fig. 4, Supplementary Fig. 3    |
| ZDB199                                                                       | 31,500            | Potentiated Cit <sup>-</sup> clone from Clade 1                                                                        | Fig. 6                          |
| ZDB200                                                                       | 31,500            | Cit <sup>-</sup> clone from Clade 2                                                                                    | Fig. 6                          |
| ZDB279                                                                       | 31,500            | Cit <sup>+</sup> mutant of ZDB199                                                                                      | Supplementary Fig. 5            |
| ZDB281                                                                       | 32,000            | Cit <sup>+</sup> mutant of ZDB183                                                                                      | Supplementary Fig. 5            |
| ZDB283                                                                       | 32,000            | Cit <sup>+</sup> mutant of ZDB30                                                                                       | Supplementary Fig. 5            |
| ZDB285                                                                       | 20,000            | Cit <sup>+</sup> mutant of ZDB464                                                                                      | Supplementary Fig. 5            |
| ZDB286                                                                       | 20,000            | Cit <sup>+</sup> mutant of ZDB464                                                                                      | Supplementary Fig. 5            |
| ZDB288                                                                       | 27,000            | Cit <sup>+</sup> mutant of ZDB309                                                                                      | Supplementary Fig. 5            |
| ZDB290                                                                       | 27,000            | Cit <sup>+</sup> mutant of ZDB310                                                                                      | Supplementary Fig. 5            |
| ZDB292                                                                       | 31,000            | Cit <sup>+</sup> mutant of ZDB390                                                                                      | Supplementary Fig. 5            |
| ZDB294                                                                       | 32,000            | Cit <sup>+</sup> mutant of ZDB30                                                                                       | Supplementary Fig. 5            |
| ZDB546                                                                       | 32,500            | Cit <sup>+</sup> mutant of ZDB31                                                                                       | Supplementary Fig. 5            |
| ZDB547                                                                       | 30,500            | Cit <sup>+</sup> mutant of ZDB20                                                                                       | Supplementary Fig. 5            |
| ZDB548                                                                       | 32,500            | Cit <sup>+</sup> mutant of ZDB32                                                                                       | Supplementary Fig. 5            |
| ZDB549                                                                       | 32,500            | Cit <sup>+</sup> mutant of ZDB31                                                                                       | Supplementary Fig. 5            |
| ZDB564                                                                       | 31,500            | Cit <sup>+</sup> clone from main population                                                                            | Fig. 4, 5, Supplementary Fig. 3 |
| ZDB595                                                                       | 32,000            | Cit <sup>+</sup> isogenic construct of ZDB30 in which <i>rnk-citT</i> module promoter was inserted into the chromosome | Fig. 4                          |
| ZDB611                                                                       | 0                 | pUC19:: <i>rnk-citT</i> transformant of REL606                                                                         | Fig. 6                          |
| ZDB612                                                                       | 32,000            | pUC19:: <i>rnk-citT</i> transformant of ZDB30                                                                          | Fig. 5, 6                       |
| ZDB614                                                                       | 31,500            | pUC19:: <i>rnk-citT</i> transformant of ZDB199                                                                         | Fig. 6                          |
| ZDB615                                                                       | 31,500            | pUC19:: <i>rnk-citT</i> transformant of ZDB200                                                                         | Fig. 6                          |
| ZDBr218                                                                      | 31,500            | Cit <sup>+</sup> mutant of ZDB25                                                                                       | Supplementary Fig. 5            |
